# Supplementary material for: Highly bright multicolor tunable ultrasmall β-Na(Y,Gd)F4:Ce,Tb,Eu/β-NaYF4 core/shell nanocrystals
Source: Royal Society of Chemistry journal article supplement (doi:10.1039/c3nr02591h), 2013-01-01
Supplement: c3nr02591h.pdf [file c3nr02591h.pdf]

Electronic Supplementary Material for Nanoscale

## Highly bright multicolor tunable ultrasmall $\beta$ -Na(Y,Gd)F<sub>4</sub>:Ce,Tb,Eu/ $\beta$ -NaYF<sub>4</sub> core/shell nanocrystals

Su Yeon Kim, Kyoungja Woo, Kipil Lim, Kwangyeol Lee, and Ho Seong Jang\*

Molecular Recognition Research Center, Korea Institute of Science and Technology, Hwarangno 14-gil 5,  
Seongbuk-gu, Seoul 136-791, Republic of Korea

\*Address correspondence to: msekorea@kist.re.kr

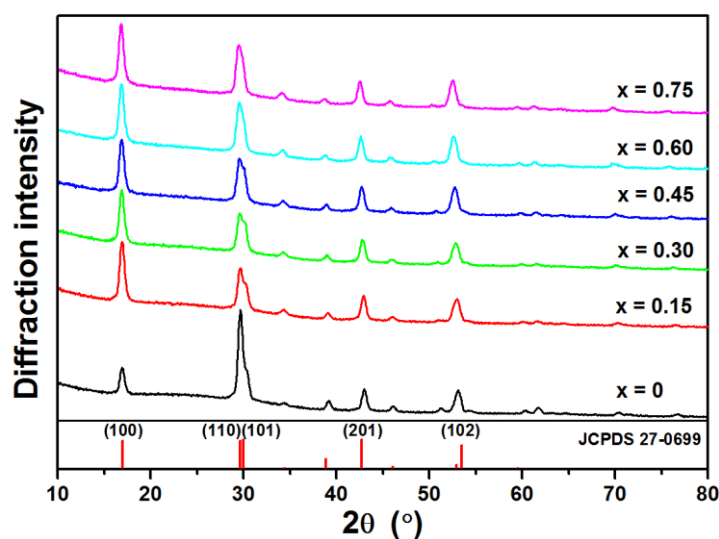

**Figure S1.** XRD patterns of  $\beta$ -Na(Y<sub>0.75-x</sub>Gd<sub>x</sub>)F<sub>4</sub>:Ce<sub>0.1</sub>Tb<sub>0.15</sub> NPs.

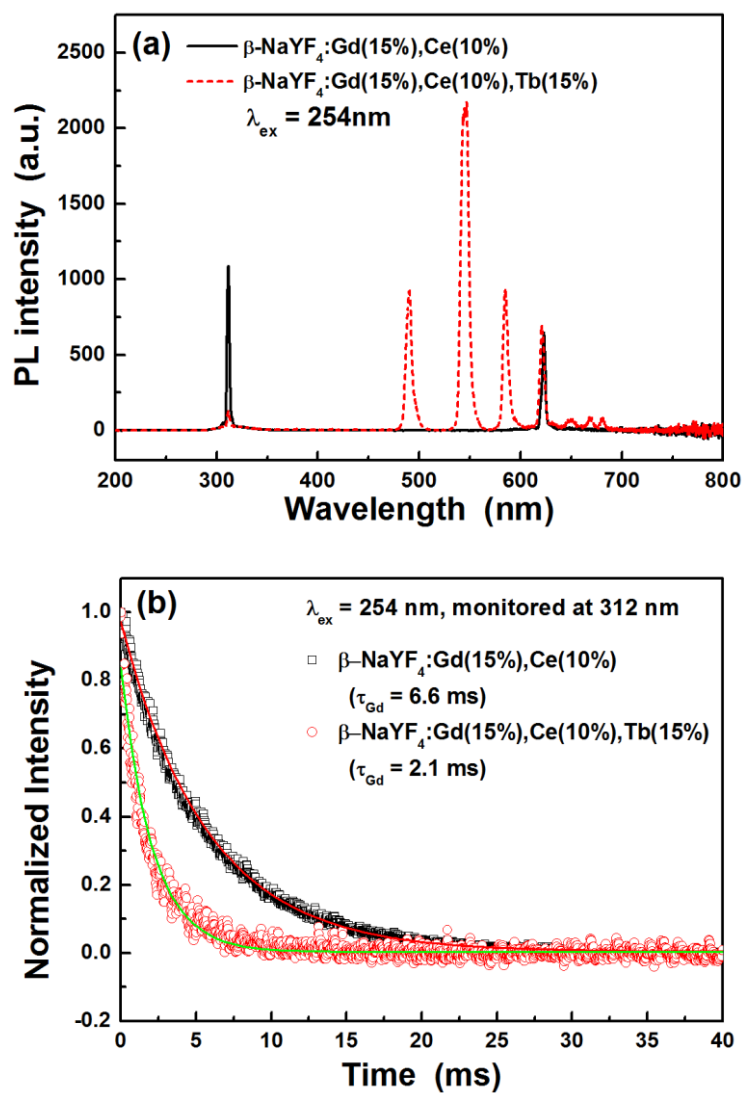

**Figure S2.** (a) PL spectra and (b) decay profiles of  $\beta\text{-NaYF}_4\text{:Gd(15\%),Ce(10\%)}$  and  $\beta\text{-NaYF}_4\text{:Gd(15\%),Ce(10\%),Tb(15\%)}$  under the excitation of 254 nm.

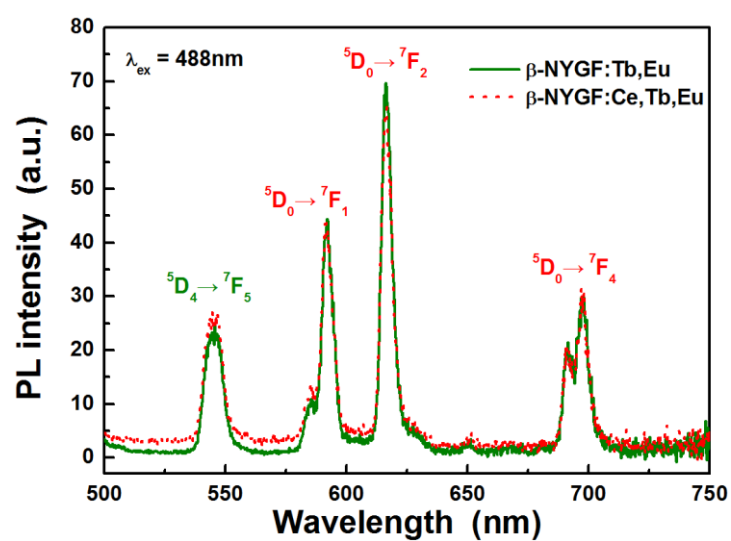

**Figure S3.** PL spectra of  $\beta$ -Na(Y,Gd) $F_4$ :Tb(15%),Eu(5%) and  $\beta$ -Na(Y,Gd) $F_4$ :Ce(10%),Tb(15%),Eu(5%) under the excitation of 488 nm.

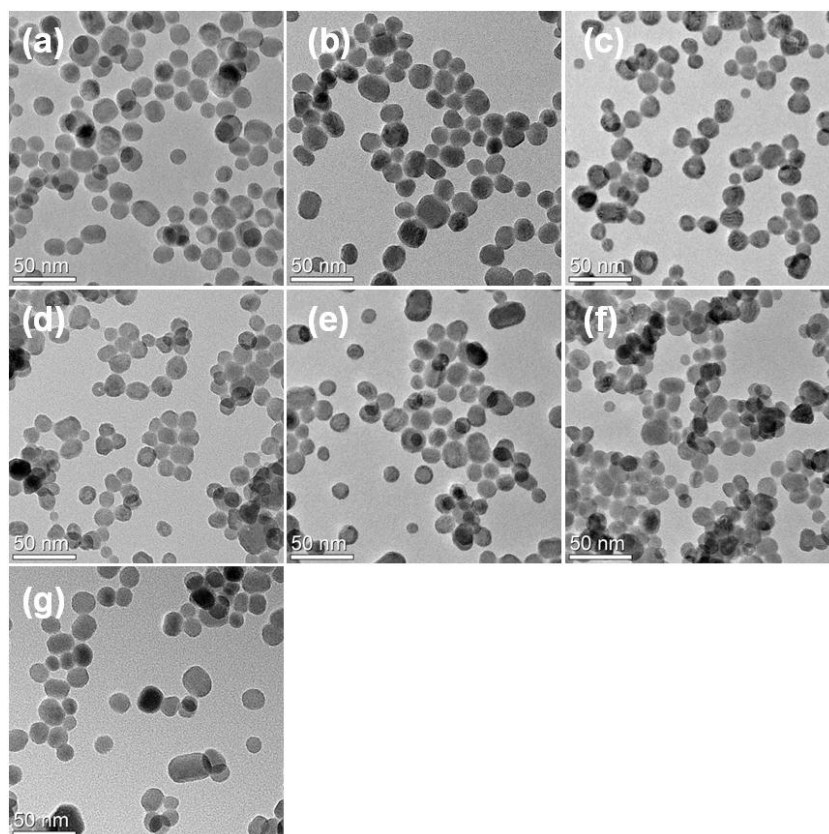

**Figure S4.** TEM images of  $\beta$ -Na(Y,Gd)F<sub>4</sub>:Ce,Tb,Eu NPs. [(Tb, Eu) = a: (15%, 0%), b: (15%, 0.5%), c: (15%, 1%), d: (15%, 2%), e: (15%, 5%), f: (15%, 10%), and g: (0%, 5%)]

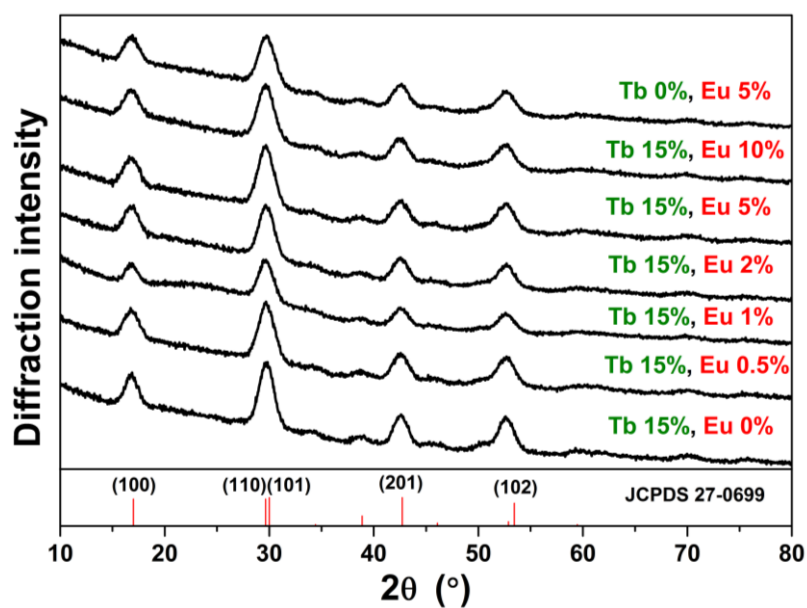

**Figure S5.** XRD patterns of sub-6 nm ultrasmall  $\beta$ -Na(Y,Gd)F<sub>4</sub>:Ce(10%),Tb,Eu NPs with varying Tb and Eu concentrations. [(Tb, Eu) = (15%, 0%), (15%, 0.5%), (15%, 1%), (15%, 2%), (15%, 5%), (15%, 10%), (0%, 5%)]

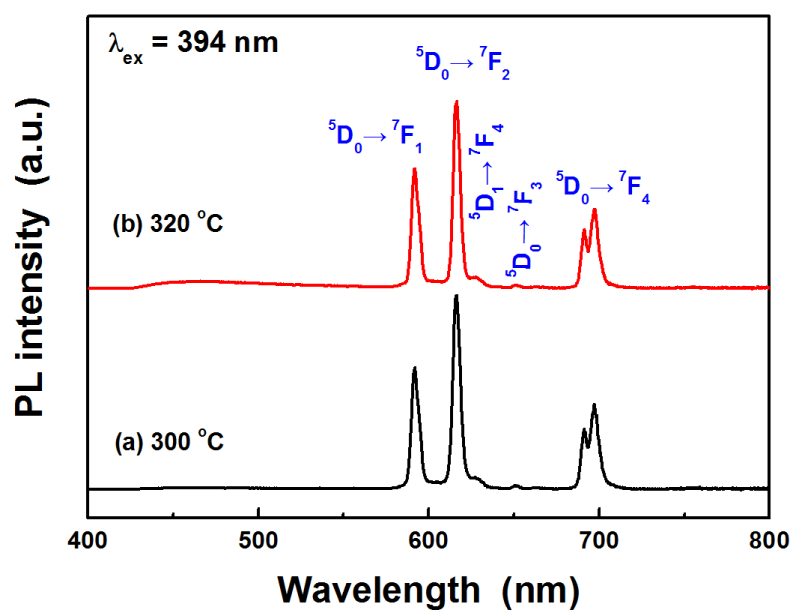

**Figure S6.** PL spectra of  $\beta$ -Na(Y,Gd) $F_4$ :Ce(10%),Tb(15%),Eu(5%) NPs synthesized at (a) 300 (black line) and (b) 320 °C (red line) under the excitation of 394 nm.

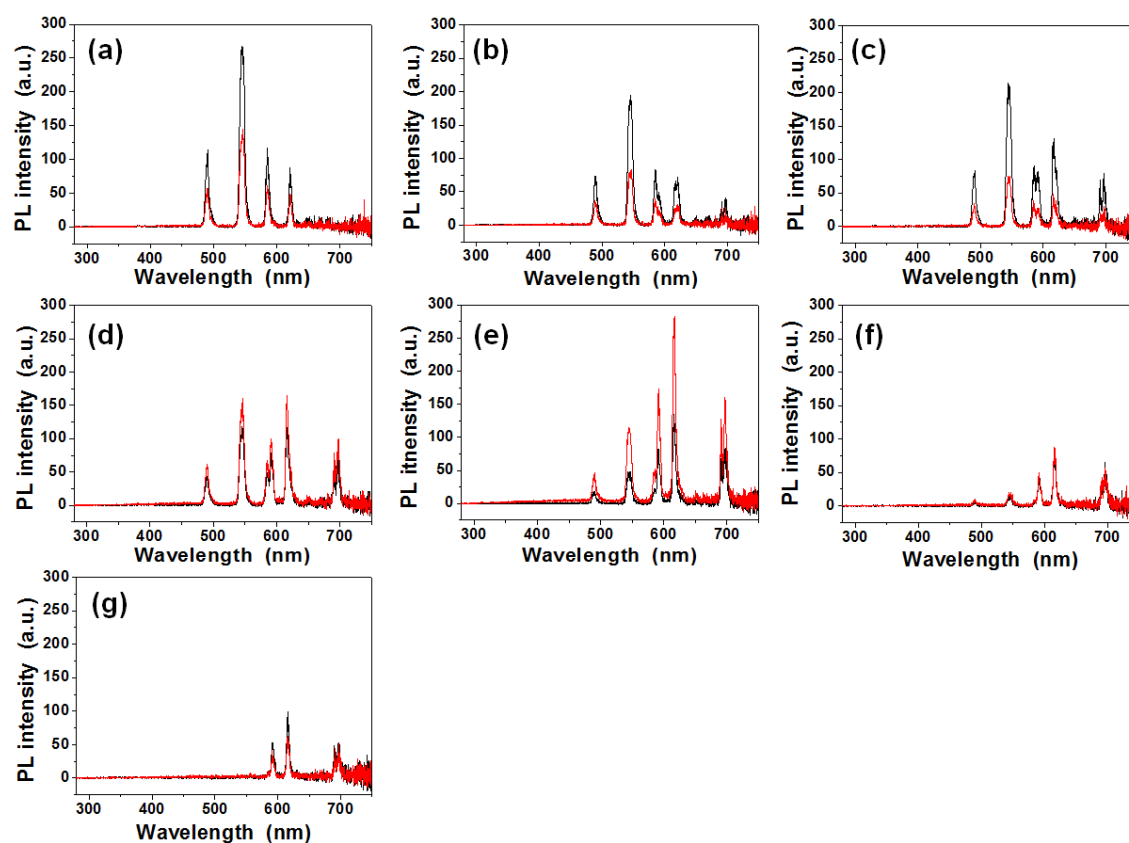

**Figure S7.** PL spectra of ultrasmall  $\beta$ -Na(Y,Gd)F<sub>4</sub>:Ce(10%),Tb,Eu core (black line) and  $\beta$ -Na(Y,Gd)F<sub>4</sub>:Ce(10%),Tb,Eu/ $\beta$ -NaGdF<sub>4</sub> core/shell (red line) NPs under the excitation of 254 nm UV light. [(Tb, Eu) = a: (15%, 0%), b: (15%, 0.5%), c: (15%, 1%), d: (15%, 2%), e: (15%, 5%), f: (15%, 10%), and g: (0%, 5%)]
